# Supplementary material for: Artificial association of memory events by optogenetic stimulation of hippocampal CA3 cell ensembles
Source: PubMed Central journal article supplement (PMC6323779; doi:10.1186/s13041-018-0424-1), 2019-01-08

Context A

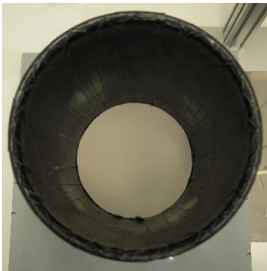

Context B

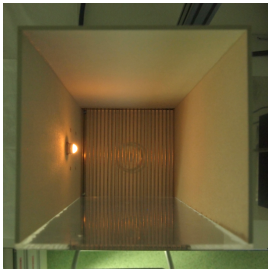

Context C

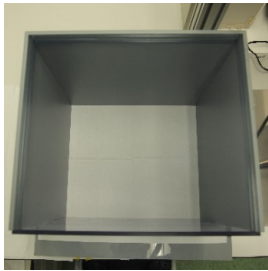

Supplement: 13041_2018_424_MOESM1_ESM.pdf [file 13041_2018_424_MOESM1_ESM.pdf]
