# Supplementary material for: Artificial association of memory events by optogenetic stimulation of hippocampal CA3 cell ensembles
Source: PubMed Central journal article supplement (PMC6323779; doi:10.1186/s13041-018-0424-1), 2019-01-08
Supplement: 13041_2018_424_MOESM2_ESM.pdf [file 13041_2018_424_MOESM2_ESM.pdf]

KA1::Cre

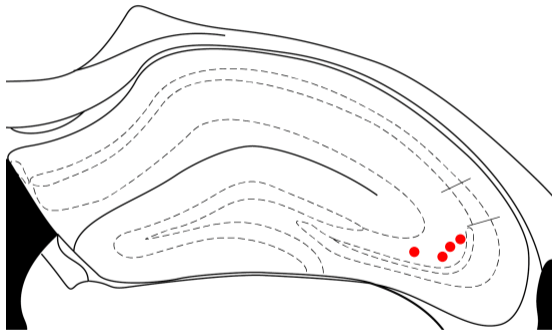

CA3-NR1 KO

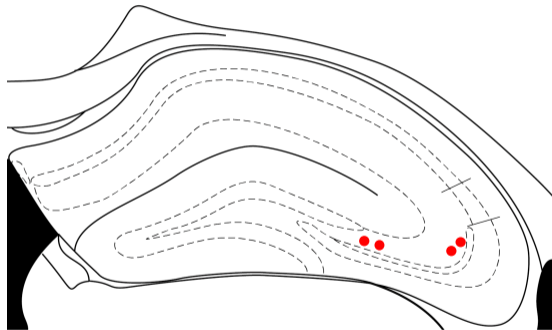

AP -2.0 mm
